# Supplementary material for: Magnetic photocatalysts with a p–n junction: Fe3O4 nanoparticle and FeWO4 nanowire heterostructures
Source: Royal Society of Chemistry journal article supplement (doi:10.1039/c4nr03729d), 2014-01-01
Supplement: c4nr03729d1.pdf [file c4nr03729d1.pdf]

## Magnetic Photocatalyst with p-n Junction: Fe<sub>3</sub>O<sub>4</sub> Nanoparticle and FeWO<sub>4</sub> Nanowire Heterostructure

Xuan Cao, Yan Chen, Shihui Jiao, Zhenxing Fang, Man Xu, Xu Liu, Lu Li, Guangsheng Pang\* and Shouhua Feng

The band gaps of the Fe<sub>3</sub>O<sub>4</sub>/FeWO<sub>4</sub> and pure FeWO<sub>4</sub> were calculated by  $\alpha h\nu = (h\nu - E_g)^n$ .  $\alpha$  is the absorbance,  $h$  is the Planck constant,  $\nu$  is the photon frequency,  $E_g$  is the energy gap, and  $n$  is the pure numbers associated with the different types of electronic transitions. For  $n = 1/2$ , 2, 3/2, and 3, the transitions are the direct allowed, indirect allowed, direct forbidden, and indirect forbidden, respectively. The value of  $n$  for FeWO<sub>4</sub> equals to 1/2 and the band gap was estimated ( $\alpha = 0$ ) to be 3.0 eV.

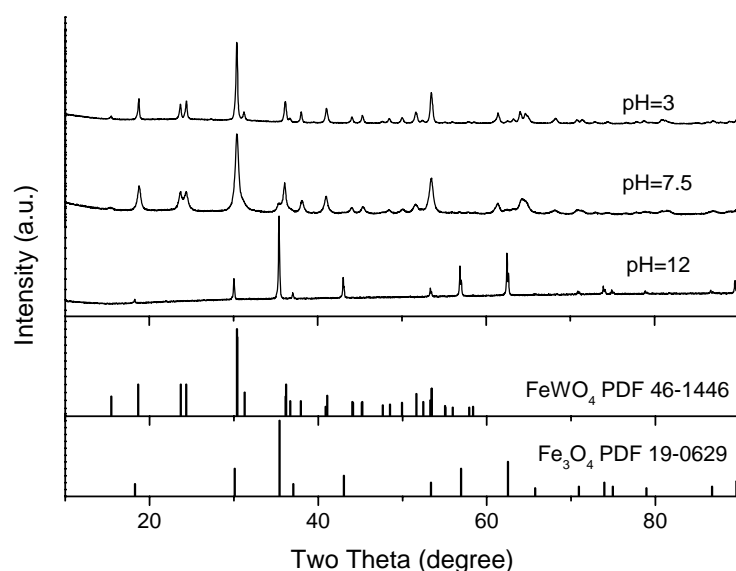

Fig. S1. As-prepared products with various pH value of the solution. Pure FeWO<sub>4</sub> nanowires (pH=3), Fe<sub>3</sub>O<sub>4</sub>/FeWO<sub>4</sub> heterostructure (pH=7), pure Fe<sub>3</sub>O<sub>4</sub> (pH=12).

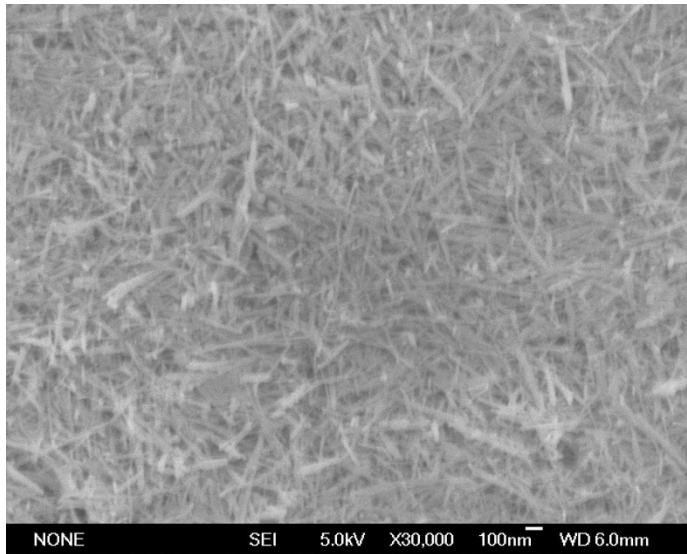

Fig. S2. SEM image of Fe<sub>3</sub>O<sub>4</sub>/FeWO<sub>4</sub> composite nanowires. (pH=7.5)

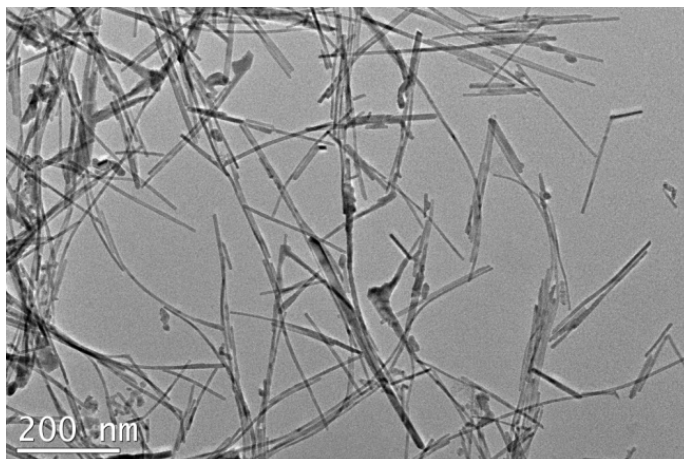

Fig. S3. TEM image of FeWO<sub>4</sub> nanowires. (pH=3)
